# Supplementary material for: Evaluation of Racial and Ethnic Disparities in Cardiac Transplantation
Source: PubMed Central journal article supplement — J Am Heart Assoc. 2021 Aug 25;10(17):e021067. doi: 10.1161/JAHA.120.021067 (PMC8649228; doi:10.1161/jaha.120.021067), 2021-08-25
Supplement: JAH3-10-e021067-s001.pdf [file JAH3-10-e021067-s001.pdf]

# **SUPPLEMENTAL MATERIAL**

**Table S1. Donor characteristics by race and ethnicity.**

| <b>Variables</b>           | <b>Black<br/>(N=7971)</b> | <b>Hispanic<br/>(N=2869)</b> | <b>White<br/>(N=21513)</b> | <b>P-Value</b>   |
|----------------------------|---------------------------|------------------------------|----------------------------|------------------|
| Age (median IQR)           | 30.0 [23.0-39.0]          | 30.0 [23.0-40.0]             | 31.0 [23.0-40.0]           | 0.158            |
| Female                     | 28.5                      | 35.2                         | 29.1                       | <b>&lt;0.001</b> |
| BMI (median IQR)           | 26.7 [23.6-30.9]          | 26.0 [22.9-30.0]             | 26.5 [23.4-30.6]           | <b>&lt;0.001</b> |
| <b>Race/Ethnicity</b>      |                           |                              |                            | <b>&lt;0.001</b> |
| White                      | 61.2                      | 50.3                         | 67.3                       |                  |
| Black                      | 20.2                      | 14.1                         | 15.1                       |                  |
| Hispanic                   | 15.5                      | 30.2                         | 14.6                       |                  |
| Asian                      | 1.8                       | 2.3                          | 1.5                        |                  |
| <b>Substance Use</b>       |                           |                              |                            |                  |
| Alcohol Use                | 16.7                      | 15.8                         | 16.7                       | 0.604            |
| Tobacco user               | 9.7                       | 8.2                          | 11.0                       | <b>&lt;0.001</b> |
| Cocaine Use                | 12.2                      | 11.9                         | 10.7                       | <b>0.012</b>     |
| Other Drug User            | 40.8                      | 38.1                         | 40.4                       | 0.108            |
| <b>Comorbidities</b>       |                           |                              |                            |                  |
| Hypertension               | 31.2                      | 34.1                         | 32.4                       | 0.057            |
| Malignancy                 | 09                        | 1.5                          | 1.4                        | 0.050            |
| Diabetes                   | 3.0                       | 3.9                          | 3.9                        | <b>0.023</b>     |
| <b>Infections</b>          |                           |                              |                            |                  |
| Pneumonia                  | 69.0                      | 67.9                         | 68.8                       | 0.679            |
| UTI                        | 11.8                      | 14.4                         | 11.2                       | <b>&lt;0.001</b> |
| HCV                        | 2.6                       | 2.3                          | 2.6                        | 0.634            |
| CMV                        | 62.6                      | 63.7                         | 60.0                       | <b>&lt;0.001</b> |
| <b>Transplant Outcomes</b> |                           |                              |                            |                  |
| Ischemic Time (IQR)        | 3.1 [2.4-3.8]             | 3.1 [2.4-3.8]                | 3.2 [2.4-3.8]              | 0.167            |

|                         |                    |                   |                    |              |
|-------------------------|--------------------|-------------------|--------------------|--------------|
| Distance Traveled (IQR) | 100.0 [14.0-296.8] | 83.0 [14.0-280.0] | 104.0 [15.0-301.0] | <b>0.041</b> |
|-------------------------|--------------------|-------------------|--------------------|--------------|

Data are presented as median (Interquartile range [IQR]) for continuous measures, and n (%) for categorical variables.

BMI = Body mass index; UTI = Urinary tract infection; HCV = Hepatitis C virus; CMV = Cytomegalovirus

**Table S2. Listing characteristics for Asian patients.**

| <b>Variables</b>                          | <b>White<br/>(N=21513)</b> | <b>Asian<br/>(N=1095)</b> | <b>P-Value</b>   |
|-------------------------------------------|----------------------------|---------------------------|------------------|
| Age                                       | 57.0 [48.0-64.0]           | 55.0 [44.0-62.0]          | <b>&lt;0.001</b> |
| Female                                    | 24.3                       | 23.6                      | 0.559            |
| BMI                                       | 27.6 [24.2-31.3]           | 23.8 [21.2-27.3]          | <b>&lt;0.001</b> |
| <b>Primary Payer</b>                      |                            |                           | <b>&lt;0.001</b> |
| Private                                   | 54.8                       | 57.5                      |                  |
| Public                                    | 44.1                       | 40.5                      |                  |
| <b>Work for Income (at listing)</b>       | 11.9                       | 13.0                      | 0.299            |
| <b>Education Level</b>                    |                            |                           | <b>&lt;0.001</b> |
| Less than Highschool                      | 1.7                        | 5.1                       |                  |
| Highschool                                | 36.8                       | 23.7                      |                  |
| Post-Highschool                           | 61.6                       | 71.2                      |                  |
| <b>Cardiac Diagnosis</b>                  |                            |                           |                  |
| Dilated Cardiomyopathy                    | 44.9                       | 45.2                      | 0.819            |
| Restrictive Cardiomyopathy                | 2.9                        | 1.6                       | <b>0.016</b>     |
| Ischemic Cardiomyopathy                   | 37.6                       | 38.8                      | 0.432            |
| Congenital cardiomyopathy                 | 4.2                        | 2.7                       | <b>0.016</b>     |
| Hypertrophic cardiomyopathy               | 3.0                        | 2.5                       | 0.275            |
| Valvular Cardiomyopathy                   | 1.4                        | 1.6                       | 0.443            |
| <b>Cardiac Support at Time of listing</b> |                            |                           |                  |
| Ventilator                                | 2.2                        | 3.3                       | <b>0.013</b>     |
| Inotropes                                 | 28.4                       | 34.9                      | <b>&lt;0.001</b> |
| LVAD                                      | 26.9                       | 22.4                      | <b>0.001</b>     |

|                                     |                   |                   |                  |
|-------------------------------------|-------------------|-------------------|------------------|
| RVAD +/- LVAD or MCS<br>unspecified | 1.6               | 2.3               | <b>0.077</b>     |
| TAH                                 | 0.5               | 0.5               | 0.687            |
| ECMO                                | 2.1               | 3.1               | <b>0.028</b>     |
| IABP                                | 5.7               | 7.1               | <b>0.045</b>     |
| <b>Comorbidities</b>                |                   |                   |                  |
| Diabetes                            | 28.2              | 38.2              | <b>&lt;0.001</b> |
| Tobacco user                        | 47.8              | 35.2              | <b>&lt;0.001</b> |
| Malignancy                          | 9.8               | 4.8               | <b>&lt;0.001</b> |
| Prior stroke                        | 5.9               | 4.5               | <b>0.045</b>     |
| ESRD                                | 2.6               | 5.5               | <b>&lt;0.001</b> |
| AICD                                | 73.4              | 62.1              | <b>&lt;0.001</b> |
| Prior Cardiac Surgery               | 43.7              | 36.4              | <b>&lt;0.001</b> |
| HLA Match (3+ alleles)              | 16.4              | <b>10.5</b>       | <b>&lt;0.001</b> |
| <b>Outcomes</b>                     |                   |                   |                  |
| Waitlist Time (IQR)                 | 84.0 [23.0-252.0] | 50.0 [13.0-160.0] | <b>&lt;0.001</b> |
| Old Status at Listing               |                   |                   | <b>&lt;0.001</b> |
| 1A                                  | 23.5              | 31.0              |                  |
| 1B                                  | 44.1              | 41.6              |                  |
| 2                                   | 32.4              | 27.4              |                  |
| New Status at Listing               |                   |                   | <b>0.001</b>     |
| 1                                   | 4.7               | 6.7               |                  |
| 2                                   | 18.6              | 25.4              |                  |
| 3                                   | 10.8              | 15.8              |                  |
| 4                                   | 39.8              | 31.1              |                  |
| 5                                   | 1.8               | 3.3               |                  |
| 6                                   | 24.4              | 17.7              |                  |

Data are presented as median (Interquartile range) for continuous measures, and n (%) for categorical variables.

BMI = Body mass index; LVAD = Left ventricular assist device; RVAD = Right ventricular assist device; MCS = Mechanical circulatory support; TAH = Total artificial heart; ECMO = Extracorporeal membrane oxygenation; IABP = Intra-aortic balloon pump; ESRD = End-stage renal disease; AICD = Automated implantable cardioverter defibrillator

**Table S3. Cox regression for outcomes among Asian patients.**

|                              | <b>Unadjusted Hazards<br/>Ratio</b> | <b>P-<br/>Value</b> | <b>Adjusted Hazards<br/>Ratio*</b> | <b>P-<br/>Value</b> |
|------------------------------|-------------------------------------|---------------------|------------------------------------|---------------------|
| <b>Transplanted</b>          |                                     |                     |                                    |                     |
| White                        | Reference                           |                     |                                    |                     |
| Asian                        | 1.37 (1.28-1.47)                    | <b>&lt;0.001</b>    | 1.38 (1.28-1.48)                   | <b>&lt;0.001</b>    |
| <b>Waitlist Death</b>        |                                     |                     |                                    |                     |
| White                        | Reference                           |                     |                                    |                     |
| Asian                        | 0.96 (0.74-1.26)                    | 0.777               | 0.85 (0.64-1.13)                   | 0.268               |
| <b>Post-Transplant Death</b> |                                     |                     |                                    |                     |
| White                        | Reference                           |                     |                                    |                     |
| Asian                        | 0.93 (0.77-1.11)                    | 0.392               | 2.20 (0.76-6.36)                   | 0.144               |

\*Adjusted for sex, age, BMI, insurance payor, work for income, education level, cardiomyopathy diagnosis, ECMO, IABP, inotropes, ventilator status, LVAD, RVAD, TAH, diabetes, ESRD, CVA, malignancy, AICD, tobacco use, prior cardiac surgery, and HLA mismatch.
